# Supplementary material for: Gene co-expression network reveals shared modules predictive of stage and grade in serous ovarian cancers
Source: PubMed Central journal article supplement (PMC5522121; doi:10.18632/oncotarget.17785), 2017-05-11
Supplement: oncotarget-08-42983-s001.pdf [file oncotarget-08-42983-s001.pdf]

# Gene co-expression network reveals shared modules predictive of stage and grade in serous ovarian cancers

## Supplementary Materials

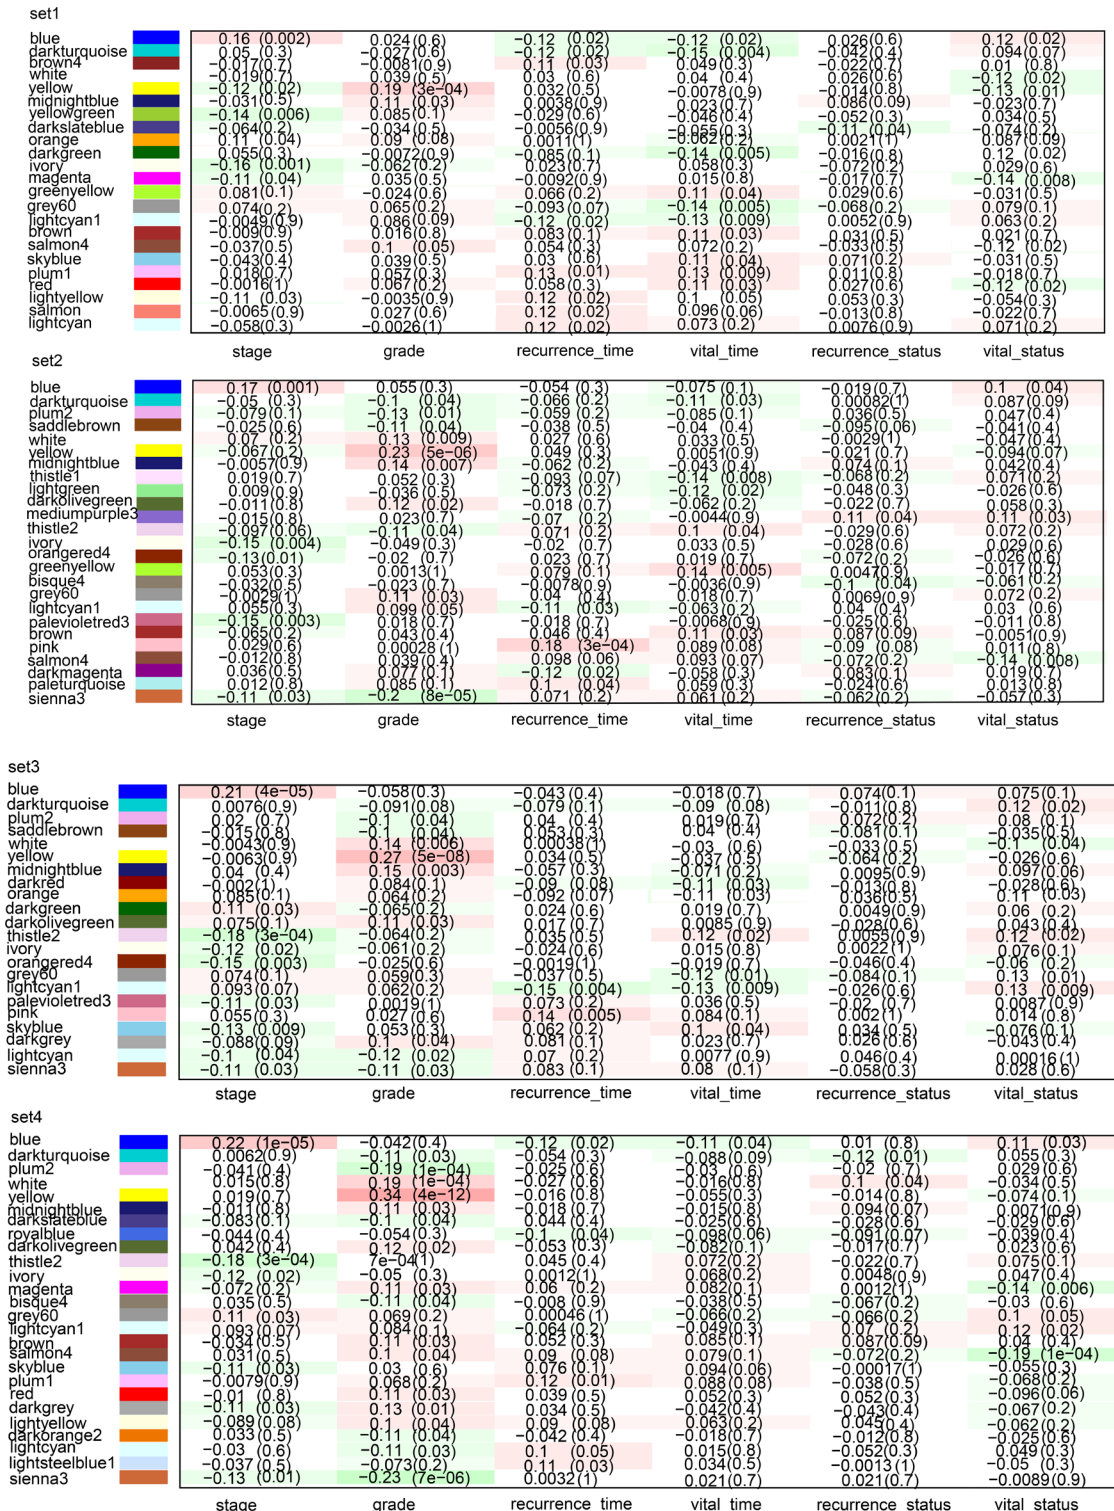

set5

|                 |               |               |                 |               |                   |               |
|-----------------|---------------|---------------|-----------------|---------------|-------------------|---------------|
| blue            | 0.17 (7e-04)  | -0.046 (0.4)  | -0.085 (0.1)    | -0.065 (0.2)  | 0.064 (0.2)       | 0.13 (0.01)   |
| darkturquoise   | 0.019 (0.7)   | -0.12 (0.02)  | -0.05 (0.3)     | -0.07 (0.2)   | 0.00072(1)        | 0.1 (0.04)    |
| plum2           | -0.075 (0.1)  | -0.13 (0.009) | -0.043 (0.4)    | -0.06 (0.2)   | -0.0073(0.9)      | 0.054 (0.3)   |
| white           | -0.0029(1)    | 0.15 (0.003)  | 0.043 (0.4)     | 0.022 (0.7)   | 0.033 (0.5)       | -0.068 (0.2)  |
| yellow          | -0.033 (0.5)  | 0.28 (3e-08)  | 0.095 (0.06)    | 0.0043 (0.9)  | -0.077 (0.1)      | -0.14 (0.007) |
| midnightblue    | -0.082 (0.8)  | -0.17 (0.001) | -0.094 (0.07)   | -0.082 (0.1)  | 0.0064 (0.9)      | 0.062 (0.3)   |
| thistle2        | -0.082 (0.1)  | -0.082 (0.1)  | 0.062 (0.2)     | 0.11 (0.03)   | -0.034 (0.5)      | 0.065 (0.3)   |
| ivory           | -0.13 (0.01)  | -0.074 (0.1)  | -0.023 (0.7)    | 0.048 (0.3)   | -0.042 (0.2)      | 0.034 (0.5)   |
| magenta         | 0.083 (0.1)   | 0.045 (0.4)   | 0.06 (0.2)      | -0.095 (0.07) | -0.095 (0.07)     | -0.16 (0.002) |
| orange          | -0.039 (0.5)  | -0.12 (0.02)  | -0.038 (0.5)    | -0.092 (0.07) | -0.062 (0.2)      | -0.077 (0.1)  |
| grey60          | 0.039 (0.4)   | 0.094 (0.07)  | -0.015 (0.8)    | -0.087 (0.09) | -0.13 (0.01)      | 0.092 (0.07)  |
| lightcyan1      | -0.00077(1)   | 0.1 (0.04)    | -0.1 (0.05)     | -0.083 (0.1)  | -0.057 (0.3)      | 0.047 (0.4)   |
| pink            | 0.064 (0.2)   | 0.031 (0.5)   | 0.14 (0.006)    | 0.061 (0.2)   | -0.055 (0.3)      | -0.046 (0.4)  |
| salmon4         | 0.039 (0.4)   | 0.1 (0.04)    | 0.055 (0.3)     | 0.049 (0.3)   | -0.057 (0.3)      | -0.084 (0.1)  |
| plum1           | -0.029 (0.6)  | 0.04 (0.4)    | 0.08 (0.1)      | 0.088 (0.09)  | 0.036 (0.5)       | -0.11 (0.04)  |
| darkgrey        | -0.091 (0.08) | 0.14 (0.006)  | -0.023 (0.7)    | -0.088 (0.2)  | -0.011 (0.8)      | -0.092 (0.07) |
| tan             | 0.058 (0.3)   | 0.11 (0.03)   | -0.0026(1)      | 0.0033 (0.9)  | 0.062 (0.2)       | 0.064 (0.2)   |
| lightyellow     | -0.12 (0.02)  | 0.067 (0.2)   | 0.089 (0.08)    | 0.052 (0.3)   | -0.028 (0.6)      | -0.034 (0.5)  |
| lightcyan       | -0.12 (0.02)  | -0.11 (0.03)  | 0.053 (0.3)     | -0.0028 (1)   | -0.028 (0.6)      | 0.0022 (1)    |
| lightslateblue1 | -0.059 (0.3)  | -0.12 (0.02)  | 0.077 (0.1)     | 0.024 (0.6)   | 0.028 (0.6)       | 0.0095 (0.9)  |
| sienna3         | -0.047 (0.4)  | -0.13 (0.01)  | 0.039 (0.4)     | 0.087 (0.09)  | 0.0081 (0.9)      | 0.027 (0.6)   |
|                 | stage         | grade         | recurrence_time | vital_time    | recurrence_status | vital_status  |

set6

|                |               |               |                 |               |                   |               |
|----------------|---------------|---------------|-----------------|---------------|-------------------|---------------|
| blue           | 0.23 (5e-06)  | -0.036 (0.5)  | -0.12 (0.02)    | -0.12 (0.02)  | 0.058 (0.3)       | 0.16 (0.002)  |
| plum2          | -0.005 (0.9)  | -0.12 (0.02)  | -0.036 (0.5)    | 0.00036 (1)   | 0.045 (0.4)       | 0.066 (0.2)   |
| saddlebrown    | 0.044 (0.4)   | -0.1 (0.04)   | -0.015 (0.8)    | 0.002 (1)     | -0.054 (0.3)      | -0.025 (0.6)  |
| white          | -0.031 (0.6)  | 0.16 (0.001)  | -0.045 (0.4)    | -0.058 (0.3)  | 0.017 (0.7)       | -0.0089 (0.9) |
| yellow         | -0.13 (0.01)  | 0.24 (2e-08)  | 0.08 (0.1)      | 0.047 (0.4)   | -0.014 (0.8)      | -0.055 (0.3)  |
| thistle1       | 0.007 (0.9)   | 0.11 (0.03)   | -0.034 (0.5)    | -0.068 (0.2)  | -0.069 (0.3)      | 0.053 (0.3)   |
| darkslateblue  | -0.076 (0.6)  | -0.024 (0.6)  | -0.045 (0.4)    | -0.14 (0.007) | -0.12 (0.02)      | -0.076 (0.1)  |
| orange         | 0.047 (0.2)   | 0.13 (0.009)  | -0.13 (0.01)    | -0.085 (0.1)  | 0.089 (0.08)      | 0.092 (0.07)  |
| darkgreen      | 0.071 (0.2)   | 0.14 (0.008)  | -0.054 (0.3)    | -0.064 (0.2)  | 0.038 (0.5)       | 0.12 (0.02)   |
| darkolivegreen | -0.091 (0.8)  | -0.15 (0.003) | -0.016 (0.8)    | -0.132 (0.5)  | -0.043 (0.9)      | 0.062 (0.3)   |
| thistle2       | -0.091 (0.8)  | 0.055 (0.3)   | 0.0056 (0.9)    | 0.036 (0.5)   | -0.062 (0.2)      | -0.045 (0.4)  |
| ivory          | -0.15 (0.003) | -0.0028(1)    | 0.0056 (0.9)    | 0.036 (0.5)   | -0.062 (0.2)      | -0.045 (0.4)  |
| magenta        | -0.11 (0.04)  | 0.15 (0.004)  | -0.0072 (0.9)   | 0.0012 (1)    | -0.033 (0.5)      | -0.028 (0.6)  |
| orange         | -0.13 (0.01)  | 0.039 (0.4)   | 0.0051 (0.9)    | -0.044 (0.4)  | -0.089 (0.08)     | -0.00022 (1)  |
| greenyellow    | -0.0027 (1)   | -0.0049 (0.9) | 0.12 (0.02)     | 0.081 (0.1)   | -0.054 (0.3)      | -0.024 (0.6)  |
| lightcyan1     | 0.035 (0.5)   | -0.14 (0.005) | -0.11 (0.04)    | -0.14 (0.007) | -0.025 (0.6)      | 0.047 (0.4)   |
| salmon4        | 0.038 (0.5)   | 0.054 (0.3)   | 0.12 (0.02)     | 0.12 (0.02)   | -0.0095 (0.9)     | -0.13 (0.01)  |
| skyblue        | -0.18 (3e-04) | 0.076 (0.1)   | 0.058 (0.3)     | 0.04 (0.4)    | -0.039 (0.4)      | -0.059 (0.3)  |
| darkgrey       | -0.11 (0.04)  | 0.12 (0.02)   | 4e-04 (1)       | -0.061 (0.2)  | -0.026 (0.6)      | -0.0033 (0.9) |
| lightyellow    | -0.12 (0.02)  | 0.076 (0.1)   | 0.11 (0.04)     | 0.032 (0.5)   | -0.021 (0.7)      | -0.085 (0.1)  |
| salmon         | -0.07 (0.2)   | 0.1 (0.04)    | -0.0095 (0.9)   | -0.032 (0.5)  | 0.028 (0.6)       | 0.04 (0.4)    |
| lightcyan      | -0.11 (0.04)  | -0.067 (0.2)  | 0.081 (0.07)    | 0.065 (0.3)   | 0.013 (0.8)       | 0.045 (0.4)   |
| sienna3        | -0.08 (0.1)   | -0.11 (0.03)  | 0.06 (0.2)      | 0.051 (0.3)   | 0.0081 (0.9)      | -0.064 (0.2)  |
|                | stage         | grade         | recurrence_time | vital_time    | recurrence_status | vital_status  |

set7

|                |                |               |                 |               |                   |               |
|----------------|----------------|---------------|-----------------|---------------|-------------------|---------------|
| blue           | 0.2 (8e-05)    | -0.042 (0.4)  | -0.11 (0.03)    | -0.059 (0.3)  | 0.097 (0.06)      | 0.081 (0.1)   |
| darkturquoise  | -0.023 (0.7)   | -0.14 (0.005) | -0.039 (0.4)    | -0.066 (0.2)  | -0.018 (0.8)      | 0.063 (0.2)   |
| plum2          | -0.071 (0.2)   | -0.15 (0.004) | -0.04 (0.4)     | -0.036 (0.5)  | -0.0034 (0.9)     | -0.0028 (1)   |
| saddlebrown    | -0.035 (0.5)   | -0.12 (0.02)  | 0.037 (0.5)     | 0.075 (0.1)   | -0.013 (0.8)      | -0.022 (0.7)  |
| white          | -0.0054 (0.9)  | 0.18 (0.003)  | 0.042 (0.3)     | 0.011 (0.7)   | -0.093 (0.9)      | -0.039 (0.4)  |
| yellow         | -0.054 (0.3)   | 0.28 (3e-08)  | 0.058 (0.3)     | 0.031 (0.7)   | -0.072 (0.2)      | -0.07 (0.06)  |
| midnightblue   | -0.083 (0.1)   | 0.12 (0.02)   | -0.049 (0.3)    | -0.049 (0.3)  | -0.0034 (0.9)     | -0.00048 (1)  |
| thistle1       | 0.08 (0.3)     | 0.026 (0.6)   | -0.075 (0.1)    | -0.13 (0.01)  | -0.1 (0.04)       | 0.052 (0.3)   |
| darkolivegreen | 0.039 (0.4)    | 0.13 (0.01)   | -0.026 (0.6)    | -0.064 (0.2)  | -0.037 (0.5)      | 0.032 (0.5)   |
| thistle2       | -0.16 (0.002)  | -0.051 (0.3)  | 0.095 (0.06)    | 0.13 (0.001)  | -0.0052 (0.9)     | 0.06 (0.2)    |
| ivory          | -0.1 (0.04)    | -0.051 (0.3)  | -0.039 (0.5)    | -0.033 (0.5)  | -0.13 (0.01)      | -0.043 (0.4)  |
| magenta        | -0.02 (0.05)   | 0.1 (0.04)    | 0.012 (0.8)     | -0.0035 (0.9) | -0.095 (0.06)     | -0.093 (0.07) |
| grey60         | -0.02 (0.7)    | 0.069 (0.2)   | -0.052 (0.3)    | -0.086 (0.09) | -0.1 (0.04)       | 0.11 (0.04)   |
| lightcyan1     | -0.017 (0.7)   | 0.099 (0.05)  | -0.088 (0.09)   | -0.088 (0.09) | -0.014 (0.8)      | 0.11 (0.03)   |
| palevioletred3 | -0.031 (0.008) | 0.042 (0.4)   | 0.055 (0.3)     | 0.063 (0.2)   | -0.034 (0.5)      | -0.13 (0.03)  |
| brown          | -0.0043 (0.9)  | 0.11 (0.03)   | 0.073 (0.2)     | 0.13 (0.009)  | 0.053 (0.3)       | -0.089 (0.08) |
| green          | -0.052 (0.3)   | 0.078 (0.1)   | 0.14 (0.006)    | 0.073 (0.2)   | -0.012 (0.8)      | -0.023 (0.7)  |
| skyblue        | -0.1 (0.04)    | 0.02 (0.7)    | 0.045 (0.4)     | 0.073 (0.2)   | -0.0073 (0.9)     | -0.041 (0.4)  |
| red            | -0.0072 (0.9)  | 0.088 (0.09)  | 0.0082 (0.9)    | 0.032 (0.5)   | -0.021 (0.7)      | -0.15 (0.004) |
| darkgrey       | -0.075 (0.1)   | 0.14 (0.007)  | -0.02 (0.7)     | -0.066 (0.2)  | -0.027 (0.6)      | -0.012 (0.8)  |
| tan            | 0.13 (0.01)    | 0.12 (0.02)   | 0.019 (0.7)     | -0.018 (0.7)  | 0.0018 (1)        | 0.058 (0.3)   |
| lightyellow    | -0.048 (0.4)   | 0.14 (0.006)  | 0.068 (0.2)     | -0.0059 (0.9) | -0.039 (0.4)      | -0.038 (0.5)  |
| sienna3        | -0.11 (0.03)   | -0.18 (5e-04) | 0.12 (0.02)     | 0.085 (0.1)   | -0.079 (0.1)      | -0.041 (0.4)  |
|                | stage          | grade         | recurrence_time | vital_time    | recurrence_status | vital_status  |

set8

|                |               |               |                 |              |                   |               |
|----------------|---------------|---------------|-----------------|--------------|-------------------|---------------|
| black          | 0.016 (0.8)   | -0.11 (0.04)  | -0.04 (0.4)     | -0.055 (0.3) | 0.013 (0.8)       | 0.031 (0.5)   |
| blue           | 0.17 (0.001)  | -0.049 (0.3)  | -0.048 (0.4)    | -0.062 (0.2) | 0.067 (0.2)       | 0.12 (0.02)   |
| darkturquoise  | 0.0077 (0.9)  | -0.14 (0.007) | -0.091 (0.08)   | -0.11 (0.04) | 0.043 (0.4)       | 0.043 (0.4)   |
| plum2          | 0.011 (0.8)   | -0.13 (0.01)  | -0.088 (0.06)   | -0.063 (0.2) | -0.06 (0.2)       | 0.058 (0.3)   |
| white          | -0.036 (0.5)  | 0.19 (2e-07)  | 0.059 (0.2)     | 0.03 (0.6)   | -0.022 (0.7)      | 0.0049 (0.9)  |
| yellow         | -0.016 (0.6)  | 0.27 (1e-07)  | 0.082 (0.1)     | 0.076 (0.1)  | 0.012 (0.8)       | -0.11 (0.04)  |
| midnightblue   | -0.023 (0.7)  | 0.14 (0.007)  | -0.039 (0.4)    | -0.038 (0.5) | 0.045 (0.4)       | 0.00023 (1)   |
| darkslateblue  | 0.0083 (0.9)  | -0.084 (0.1)  | -0.095 (0.06)   | -0.13 (0.01) | -0.029 (0.6)      | -0.052 (0.3)  |
| royalblue      | -0.11 (0.04)  | -0.055 (0.3)  | -0.043 (0.4)    | -0.052 (0.3) | -0.074 (0.2)      | -0.082 (0.1)  |
| darkgreen      | 0.093 (0.07)  | -0.089 (0.08) | -0.043 (0.4)    | -0.082 (0.1) | 0.048 (0.3)       | 0.12 (0.02)   |
| mediumpurple3  | -0.03 (0.6)   | -0.012 (0.8)  | -0.13 (0.009)   | -0.044 (0.4) | 0.15 (0.004)      | 0.067 (0.2)   |
| thistle2       | -0.13 (0.01)  | 0.0082 (0.9)  | 0.049 (0.3)     | 0.065 (0.2)  | -0.02 (0.7)       | 0.038 (0.5)   |
| ivory          | -0.12 (0.02)  | -0.053 (0.3)  | -0.068 (0.2)    | -0.019 (0.7) | -0.004 (0.9)      | -0.0083 (0.9) |
| magenta        | -0.13 (0.01)  | 0.071 (0.2)   | 0.0032 (0.9)    | 0.0085 (0.9) | -0.02 (0.7)       | -0.071 (0.2)  |
| orange         | -0.026 (0.6)  | -0.042 (0.4)  | 0.072 (0.5)     | -0.075 (0.1) | -0.057 (0.3)      | -0.093 (0.07) |
| greenyellow    | -0.067 (0.2)  | 0.0066 (0.9)  | 0.033 (0.5)     | 0.11 (0.04)  | 0.033 (0.5)       | -0.031 (0.5)  |
| bisque4        | -0.067 (0.2)  | -0.06 (0.2)   | -0.032 (0.5)    | -0.025 (0.6) | 0.0022 (1)        | -0.043 (0.4)  |
| grey60         | 0.11 (0.03)   | 0.061 (0.2)   | 0.061 (0.2)     | 0.022 (0.9)  | -0.018 (0.7)      | 0.11 (0.04)   |
| palevioletred3 | -0.11 (0.03)  | 0.0022 (1)    | 0.048 (0.4)     | 0.05 (0.3)   | -0.025 (0.6)      | -0.028 (0.6)  |
| brown          | 0.02 (0.7)    | 0.12 (0.02)   | -0.0084 (0.9)   | 0.07 (0.2)   | 0.064 (0.2)       | 0.12 (0.02)   |
| pink           | 0.028 (0.6)   | -0.016 (0.7)  | 0.17 (0.001)    | 0.11 (0.03)  | -0.039 (0.5)      | -0.037 (0.5)  |
| salmon4        | 0.058 (0.3)   | 0.14 (0.007)  | 0.057 (0.3)     | 0.045 (0.4)  | -0.12 (0.02)      | -0.094 (0.07) |
| skyblue        | -0.14 (0.005) | 0.02 (0.7)    | 0.048 (0.4)     | 0.071 (0.2)  | -0.01 (0.8)       | -0.07 (0.2)   |
| plum1          | -0.07 (0.2)   | 0.048 (0.4)   | 0.11 (0.03)     | 0.084 (0.1)  | -0.058 (0.3)      | -0.0086 (0.9) |
| red            | -0.028 (0.6)  | 0.11 (0.03)   | 0.037 (0.5)     | 0.049 (0.3)  | -0.048 (0.4)      | -0.12 (0.02)  |
| darkgrey       | -0.11 (0.04)  | 0.16 (0.001)  | 0.059 (0.2)     | 0.017 (0.7)  | -0.054 (0.3)      | -0.032 (0.5)  |
| floralwhite    | -0.052 (0.3)  | 0.1 (0.04)    | 0.023 (0.7)     | 0.038 (0.5)  | -0.062 (0.2)      | -0.031 (0.5)  |
| tan            | -0.059 (0.2)  | -0.058 (0.3)  | 0.023 (0.7)     | 0.002 (0.9)  | -0.002 (0.7)      | -0.016 (0.8)  |
| salmon         | -0.059 (0.2)  | -0.058 (0.3)  | 0.11 (0.03)     | 0.067 (0.2)  | -0.002 (0.7)      | -0.037 (0.5)  |
| sienna3        | -0.11 (0.03)  | -0.11 (0.03)  | -0.01 (0.8)     | -0.013 (0.8) | -0.062 (0.2)      | -0.09 (0.08)  |
|                | stage         | grade         | recurrence_time | vital_time   | recurrence_status | vital_status  |



set9

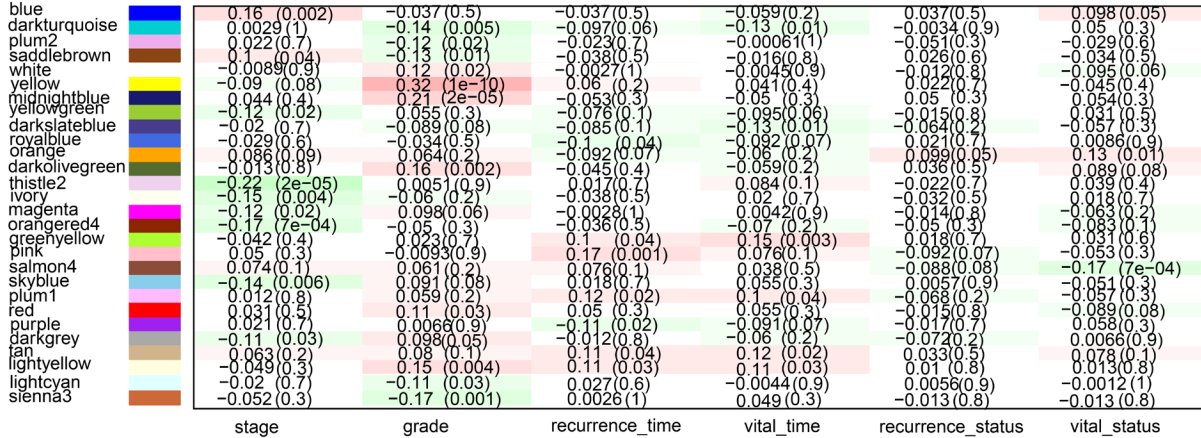

set10

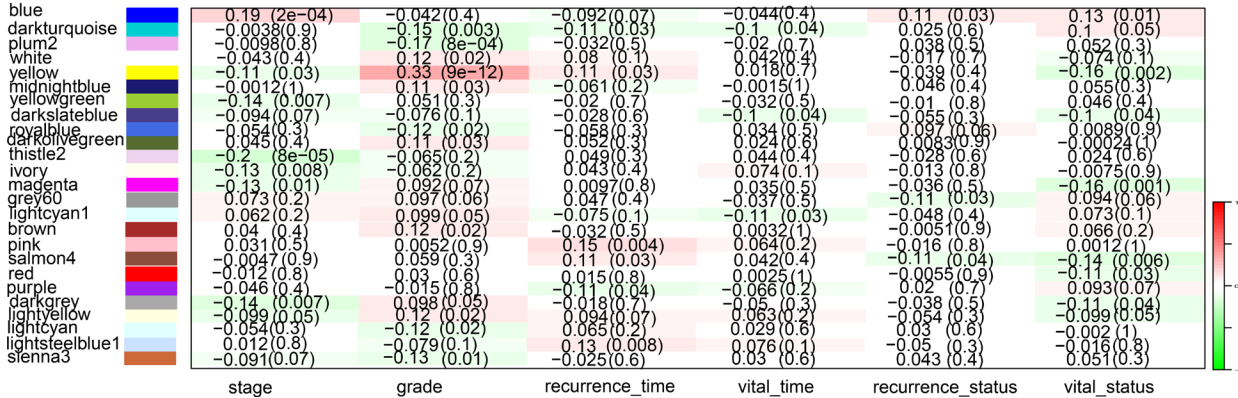

**Supplementary Figure 1: Module-trait relationships across ten random sampling datasets.** Correlation values and  $p$  values (in parenthesis) of module-trait relationships were demonstrated. Each row represented the module named after its color and each column represented the traits, containing tumor stage, grade, recurrence time, vital time, recurrence status and vital status. Any modules showed significant relationships with one or more traits were demonstrated ( $p$  value < 0.05).

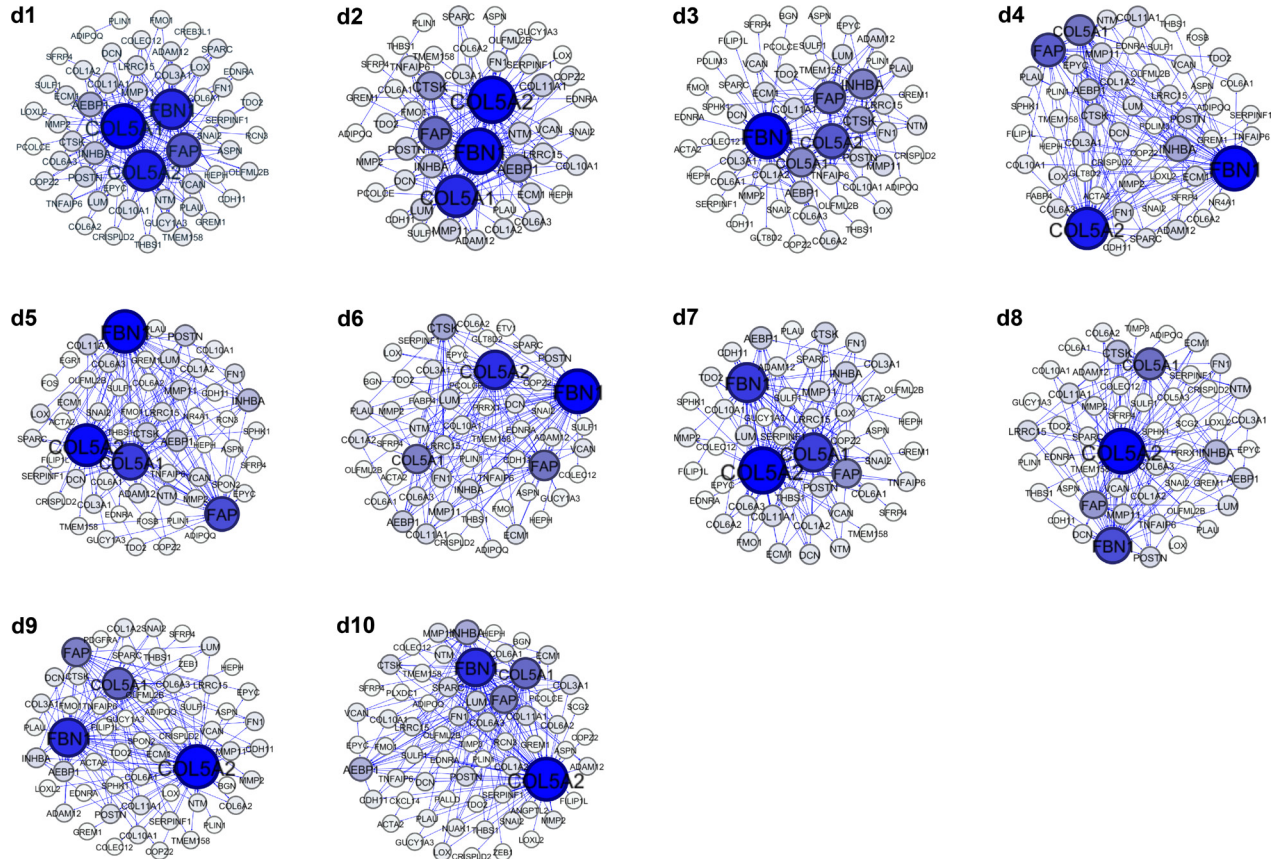

**Supplementary Figure 2: The blue module gene network of top 200 hub genes in ten datasets.** Hub genes of module were shown in blue, gene importance were according to the diameter of circle and color depth in descending order.



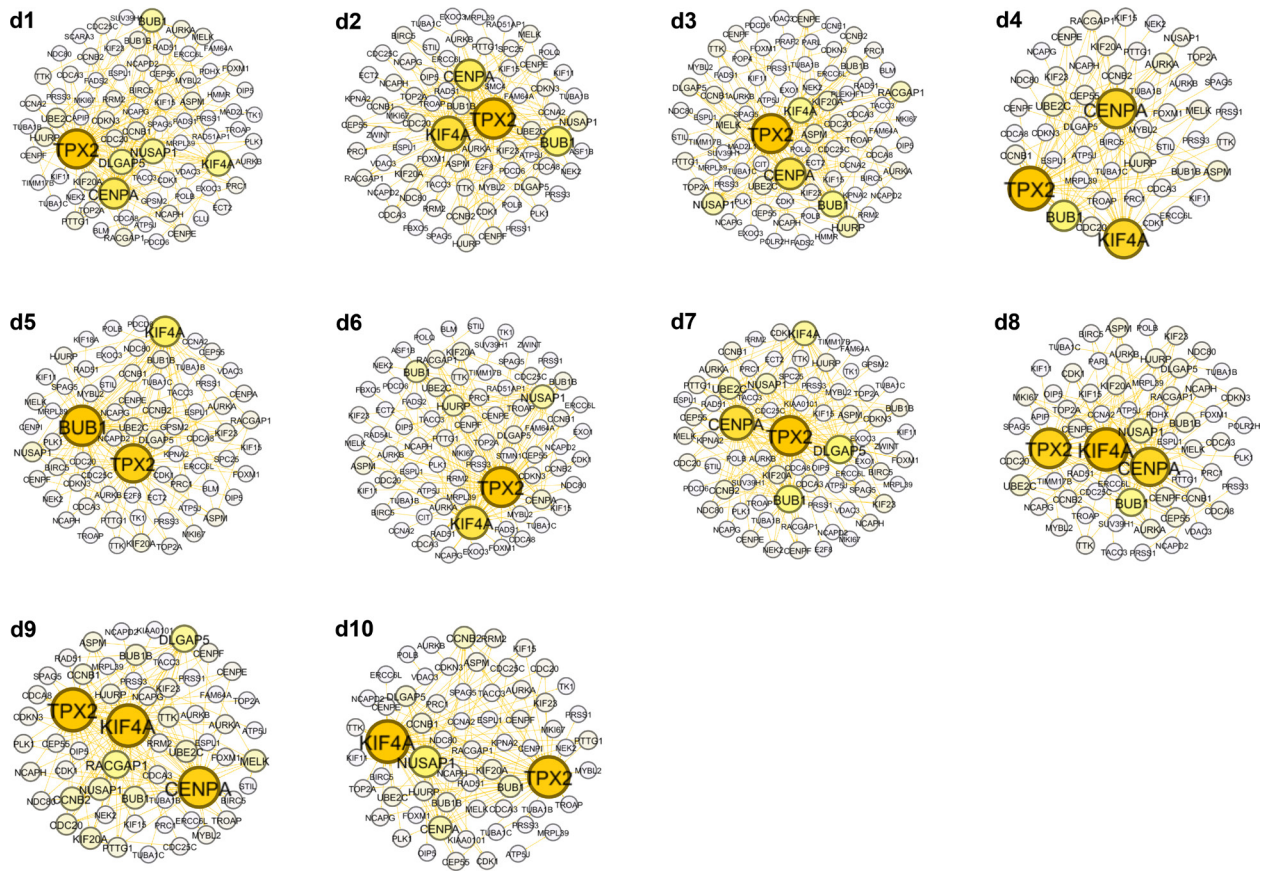

**Supplementary Figure 3: The yellow module gene network of top 200 hub genes in ten datasets.** Hub genes of module were shown in yellow, gene importance were according to the diameter of circle and color depth in descending order.

**Supplementary Table 1: module preservations of all significant modules across ten datasets.** See Supplementary\_Table\_1

**Supplementary Table 2: Gene names of four meaningful modules.** See Supplementary\_Table\_2
